# Supplementary material for: Assessing qualitative long-term volcanic hazard at Lanzarote Island (Canary Islands)
Source: Copernicus journal article supplement (doi:10.5194/nhess-2017-2), 2017-01-16
Supplement: Supplementary file [file nhess-2017-2-RC1-supplement.pdf]

# Assessing qualitative long-term volcanic hazard at Lanzarote Island (Canary Islands)

Laura Becerril<sup>1</sup>, Joan Martí<sup>1</sup>, Stefania Bartolini<sup>1</sup>, Adelina Geyer<sup>1</sup>

<sup>1</sup> Institute of Earth Sciences Jaume Almera, ICTJA-CSIC, Lluís Solé i Sabarís s/n, 08028 Barcelona, Spain

Correspondence to: Laura Becerril (laurabcar@gmail.com)

**Abstract.** Conducting long-term hazard assessment in active volcanic areas is of primordial importance for land planning and to define emergency plans able to be applied in case of a crisis. Definition of scenario hazard maps helps to mitigate the consequences of future eruptions by anticipating to the events that may occur. Lanzarote is an active volcanic island that has hosted the largest ( $>1.5 \text{ km}^3$  DRE) and longest (6 years) eruption, the Timanfaya eruption, on the Canary Islands in historical times (last 600 years). This eruption brought severe economic losses and forced local people to migrate. In spite of all these facts, no comprehensive hazard assessment neither hazard maps have been developed for the island. In this work, we present an integrated long-term volcanic hazard evaluation using a systematic methodology that includes spatial analysis and simulations of the most probable expected eruptive scenarios.

## 1 Introduction

Active volcanic areas require conducting long-term hazard assessment in order to ensure a rational land planning and to elaborate precise emergency plans that can be applied in case of a crisis. Moreover, the long-term hazard assessment is important to identify the main aspects related to volcanic hazards that may impact on an area and that should be known by local population and potential visitors, especially when these may potentially affect touristic destinations. Unfortunately, this is not the case of many active volcanic areas around the World, particularly in those places with lower eruption frequency, thus making the historical memory of local societies to rapidly forget about past events. Also, when past eruption impacts have not been very significant, without causing a serious damage on human life and properties, they might become nowadays a socio-economic disaster due to the increase of exposition of most places and vulnerability of exposed elements.

This is, for example, the case of the Canary Islands where, despite having hosted 15 eruptions in historical times, volcanic hazard assessment is still a pending task for most of the islands. This volcanic archipelago, which includes four National Parks, is one of the most important touristic destinations in Europe. Tourism has had a considerable economic impact on the region that has abandoned some traditional livelihoods and has suffered a tremendous demographic expansion. The latter, not always well planned and without considering potential natural hazards, may now interfere with the effective management of future volcanic crisis. The last eruption, that occurred in El Hierro (Fig. 1 Inset) in 2011-2012, is a good example of the implications of not having conducted a previous hazard assessment. Despite having an emergency plan that was correctly applied during the crisis, the occurrence of a submarine eruption

was not considered ~~as~~ a probable scenario, <sup>that was later on</sup> having proved this as ~~the~~ most probable scenario by ~~further~~ <sup>as the</sup> studies (Becerril et al., 2013, 2014, 2015).

Here, we concentrate our attention on Lanzarote (Fig. 1), the easternmost island of the Canary archipelago. It has hosted the largest historical eruption of the Canaries (Timanfaya, 1730-1736) and one of the largest occurred on European territory. Lanzarote, declared Biosphere Reserve by UNESCO (1993, <http://www.lanzarotebiosfera.org/>) and Global Geopark (2015, <http://www.geoparque Lanzarote.org/>), is an important touristic destination with 12 natural protected areas (<http://www.gobiernodecanarias.org/cmavot/espaciosnaturales/>) and a National Park (1974, <http://www.gobiernodecanarias.org/parquesnacionalesdecanarias/es/Timanfaya/>) that receives near 1.5 million visitors per year. As in the rest of the Canary Islands, local economy is tourism based and volcanism is regarded as an attraction and not as a potential problem for both local population and visitors.

During the last two decades, several attempts have been carried out to analyse volcanic hazard in Lanzarote. The first published works correspond to Felpeto (2002) and Felpeto et al. (2001, 2007) who presented a new methodology for the evaluation of the lava flow hazard on Lanzarote. However, these studies only focused on simulating lava flows related to a Timanfaya type eruption without performing a general susceptibility analysis or a lava flow map for the whole island. Bartolini et al. (2013) presented the first susceptibility map of Lanzarote as an example of application of the QVAST tool, using the volcano-structural information available at that time. More recently, Galindo et al. (2016) published a spatial probability map of Lanzarote and Chinijo Islands and their submarine flanks. Their analyses were based on kernel density estimation via a linear diffusion process, using chronostratigraphic, volcano-structural and geomorphological data. However, none of these previous studies tackles a proper volcanic hazard assessment for Lanzarote, although the information they provide should contribute to accomplish such task.

In this study, we applied a systematic methodology to conduct long-term volcanic hazard assessment at Lanzarote, based on a review of these previous studies and the application of the methodology and e-tools described by Martí et al (2016a) (see [www.vetools.eu](http://www.vetools.eu)), which includes the sequential application of spatial analysis, temporal analysis, simulation of most probable scenarios, and vulnerability analysis. In the case of Lanzarote and due to the scarce available information (e.g.: lack of geochronological data), we only conducted the spatial analysis and the simulation of eruptive scenarios. The latter included the main volcanic hazards (fallout, lava flows, and pyroclastic density currents) recognised in the Holocene volcanism in Lanzarote. Results obtained are volcanic hazard scenario maps, which should be considered for land-use planning, elaboration of emergency plans, and for managing a volcanic crisis, in order to protect people, their properties and the geological heritage of the island.

## 2 Geographical and Geological Setting

The island of Lanzarote (Canary Archipelago, Spain) is the north-easternmost island of the Canaries, located 125 km far from the western African coast and just 7 km towards the north of Fuerteventura (Fig. 1). It has an irregular morphology elongated NE-SW, with a maximum altitude of 671 m (Macizo de Famara) and covers an area of 846 km<sup>2</sup>, which includes some islets located to the North. It rises approxi-

is connected  
mately 2500 m from the sea bottom, being most part of the volcanic edifice submerged. Actually, it ~~is~~<sup>s</sup> connected in its submerged part with the island of Fuerteventura, both constituting the same volcanic edifice (Banda et al., 1981).

The basement of the island was constructed during the Oligocene above oceanic sediments of 65-55 Ma old, formed by submarine volcanic materials, plutonic rocks and sediments. It is located on an atypical oceanic crust, at least 11 km thick (Banda et al., 1981), or up to 15 km (Ortiz et al., 1986; Camacho et al., 2001). The subaerial volcanic history of Lanzarote started about 15.5 Ma ago (Coello et al., 1992) (Fig. 1). In addition to the volcanic materials, there are sedimentary formations, represented by aeolian sands, alluvial and colluvial deposits, mainly Pliocene and Quaternary (Fig. 1) (IGME, 2005).

Two major volcanic cycles have been established during its growth. The first cycle corresponds to the old buildings construction (between 11 and 3 Ma) and was characterised by the emission of important volumes of basaltic materials that formed a complex tabular sequence of lavas and pyroclasts gently dipping to the SE and ESE, with isolated outcrops of differentiated trachybasalts and trachytes (Fig. 1) (IGME, 2005). This first stage represents the maximum subaerial growing period (Ancochea et al., 2004), characterised by a really high eruptive rate, approximately 0.01-0.02 km<sup>3</sup>/ka (Coello et al., 1992). Los Ajaches, Famara and Tías Massifs are part of this cycle (Fig. 1) (Carracedo and Badiola 1993). The second stage (3 Ma - present) was characterised by a period of Pleistocene-Holocene eruptions and historical eruptions (last 600 years) (IGME, 2005). This second subaerial cycle includes the recent activity of Lanzarote and the growth of the small islands located to the North, the Chinijo Archipelago (Fig. 1) (Ancochea et al., 2004). It was characterised by the formation of widespread lava fields covering the materials of the first stage, and by the alignment of most vents trending NE-SW. On the other hand, the Chinijo Archipelago was also constructed by hydromagmatic eruptions (De la Nuez et al., 1997). It is marked by the emission of alkaline rocks that evolved to basaltic magmas, with a decrease of the alkalinity, and finally the emission of tholeiitic olivine basalts (Armienti et al. 1991; Carracedo and Badiola 1993). This second cycle of growth is characterised by continuous volcanic activity with eruptive rates of 0.013-0.027 km<sup>3</sup>/ka (Coello et al. 1992).

Two historical eruptions took place on the island: the Timanfaya (1730-1736) and the Tao, Nuevo Fuego and Tinguatón eruption (1824). Both were multiple-fissure type eruptions but quite different in size and duration. The Timanfaya eruption lasted ~~for~~ 6 years and formed hundreds of vents aligned along a 13-15 km long fissure, from where lava flows covered almost one-third of the island, erupting a total of > 1.5 km<sup>3</sup> of magma (Romero, 1991; Carracedo et al., 1992) (Fig. 2). During the 1824 eruption, three eruptive fissures were formed emitting few pyroclasts and some lava flows, with lengths in the order of hundred meters (Romero, 1991; Carracedo et al., 1992) (Fig.2).

### 3 Methodology

The first step in any long-term volcanic hazard assessment is the reconstruction of the past eruptive history of the volcano or volcanic area. In this sense, we based our analysis on the Holocene period from where we identified the different eruptive episodes and their products and established a relative volcano-stratigraphy for all of them. To accomplish this task we took into account previous geological and vol-

canological studies of Lanzarote (Romero, 1991; Carracedo et al., 1992; Ancochea et al. 2004; IGME maps (2004), and references therein) and completed them with new field work when necessary. We have also conducted a structural analysis of the island based on previous geological maps at 1:25000 scale (MAGNA, GEODE) and structural studies (Marinoni and Pasquarè, 1994; Galindo et al., 2016), and on remote sensing and morpho-tectonic analysis of orthophotos (GRAFCAN (<http://www.grafcan.es/>), topography (LIDAR Digital Elevation Model (1:5000), GRAFCAN ©) and bathymetry (1:100.000, IEO). In addition to these volcano-structural features, we also took into account in the computation of volcanic susceptibility the recently modelled regional stress field for the Canary Islands (Geyer et al., 2016).

The previous information was used to define the input parameters necessary to run the different tools we have applied to conduct the systematic hazard assessment. These form part of the methodology described by Martí et al. (2016a), (<http://www.vetools.eu/>), i.e. QVAST (Bartolini et al., 2013) for the spatial analysis (volcanic susceptibility), and VORIS (Felpeto et al., 2007), a GIS-based tool that allows users to simulate lava flows, fallout, and pyroclastic density current scenarios.

#### 4 Holocene volcanism

Holocene eruptions in Lanzarote are restricted to a few sub-historical fissures at the northeast (Guatiza area), and the historical eruptions located towards the western-central part of the island (Timanfaya area) (Fig. 2d).

Most sub-historical eruptions are fissure type, basic in composition (olivine basalts), with clear Strombolian character, (IGME, 2004) (Guatiza map). Their main products are proximal fallout pyroclastic deposits and lava flows, mainly of 'aa' type, which reached the sea generating a platform, so having at least 5 km in length. Lava flows from Mt. de Guenia, Las Calderas de Guatiza, Las Calderas and Las Calderetas (Fig. 2d) come from fissures with trending N30°E - N37°E, being from 1-1.5 m to several meters wide. They have associated several scoria cones showing a great range of particle sizes (IGME, 2004) (Guatiza map).

Hydrovolcanic events also occurred on Lanzarote during the Holocene and previous times. They include both Surtseyan eruptions, caused by the interaction of magma with water in coastal or shallow offshore settings, and inland phreatomagmatic eruptions generated by interaction of erupting magmas with groundwater (Pedrazzi et al., 2013). Several well preserved hydrovolcanic edifices are identified on the island and islets (Fig. 2b). El Golfo (Martí and Colombo, 1990; Pedrazzi et al. (2013), La Caldera del Cuchillo, Mt. Cavera and Mt. Chica are some examples of hydromagmatic coastal edifices (Fig. 2b, Table 1) (Aparicio et al., 1994). The main characteristics of these eruptions and their subsequent deposits have been gathered from geological maps (IGME (2004)) and some previous studies (Martí and Colombo (1990); Carracedo and Badiola (1991); Aparicio et al. (1994); Pedrazzi et al. (2013); IGME (2004)-Geological Maps). They are summarised in Table 1.

Historical eruptions (both 1730-36 and 1824) were also of basaltic character. Timanfaya eruption differs from the rest of the Canary Islands historical eruptions, mainly because of its long duration, magnitude, type and evolution of magmas (Carracedo et al., 1992). It is the second largest historical effusive eruption in Europe (last 600 years) after Laki (1783-85) in Iceland (Thordarson and Self, 1993). A com-

plex fissural volcanic system of approximately 13-15 km length, with more than 30 cones, was formed during this eruption (Fig. 2c), that produced lava flows and pyroclastic fallout that covered approximately 226 km<sup>2</sup> of the Lanzarote's surface (Hernández Pacheco, 1960; Carracedo et al., 1992). The total volume expelled was between 3 and 5 km<sup>3</sup> (>1.5 km<sup>3</sup> DRE). Lava flows reached the coast, and maximum onshore paths reached up to 21 km. Some of the stages of this eruption have been studied in detail by Romero et al. (1991), Carracedo et al. (1992) and Solana et al. (2004).

The consequences of 6 years of activity were that more than one-third of farmland and numerous villages of the island were buried by ash and the accompanying degassing resulted in acidic rain fall, which triggered the evacuation and economic collapse of the island (Carracedo et al., 2012; Solana et al., 2004).

The 1824 eruption was characterized by basanitic products. Three cinder cones were formed during three months of activity (Tinguatón, Tao and Nuevo del Fuego; Fig. 2), generating an intermittent fissure almost 14 km in length. They produced a small lava flow, with a total on land length of 7-8 km that reached the SW coast of the island.

## 5 Volcano-tectonics

To identify the different structural elements that we will consider in the susceptibility analysis, we defined vents and eruptive fissures following the same criteria established by Becerril et al. (2013, 2014, and 2015) on El Hierro. Thus, we recognised: (i) craters of isolated cinder cones, (ii) craters of coalescent cinder cones belonging to the same eruptive fissure, and (iii) craters without an associated cinder cone, both, submarine and subaerial. We discarded hornitos and rootless vents as volcanic vents to avoid over-value susceptibility analysis, since they are not lava emissions centres. Submarine eruptive vents morphologically recognisable were considered as volcanic cinder cones, including those located at the north of Fuerteventura, due to the proximity to Lanzarote and also because they belong to the same volcanic edifice.

From the volcano-structural study, we have obtained different datasets that correspond to vents and eruptive fissures, both onshore and offshore the island, and onshore faults (Table 2). Volcano-structural datasets were divided according to the age of the structures and their location (onshore or offshore) (Table 2). Thus, we obtained Miocene-Pliocene, Pleistocene and Holocene onshore vents, and eruptive fissures respectively, besides offshore vents and eruptive fissures (Fig. 3, Table 2). Only 6 faults have been identified on the island. The majority of the linear structures (eruptive fissures and faults) follow the NE-SW direction and they are from less than 1 km to 15 km length (Table 2).

## 6 Susceptibility analyses

The spatial probability of a future vent opening, given the past eruptive activity of a volcanic system, is a crucial step for simulating possible future eruptive scenarios, as it will provide indication from where the eruption will start, and how the corresponding hazards will distribute (Martí and Felpeto, 2010). The information required to perform this susceptibility analysis is the distribution of the past volcano-

structural elements. This volcano-structural information is used to pinpoint areas where next eruptions may most likely occur since they represent the sites where previous eruptions have taken place, based on the premise that new vents will not form far from the previous ones (Connor, 1990; Connor et al., 1992, 2000; Ho, 1992, 1995; Martin et al., 1994; Ho and Smith, 1998; Connor and Conway, 2000; Gaffney et al 2017; Martí and Felpeto, 2010; Bebbington and Cronin, 2011, Capello et al., 2012; Selva et al., 2012; le Corvec et al., 2013a; Bartolini et al., 2013; Bevilacqua et al., 2015; Martí et al., 2016b). This reasoning is based on the assumption that the regional stress field has not changed since the last eruption. Therefore, other kind of data such as geophysical information or the stress field configuration of a volcanic area, if available, should be also used to forecast more precisely the most probable areas to host future vents (Martí and Felpeto, 2010; Martí et al., 2016b). In particular, the stress field is a key parameter controlling magma generation, magma migration and magma accumulation inside the volcanic system, as well as the location, geometry and the distribution of the resulting volcanism at surface (Martí et al, 2016b). Therefore, knowing the stress configuration in the lithosphere at any scale (i.e. local, regional and plate-scale) is important to understand the distribution of volcanism and, subsequently, to predict the location of future eruptions (Martí et al., 2016b). For that reason, in this work we also considered the regional stress field configuration under Lanzarote, taking into consideration Geyer et al. (2016).

We used the QVAST tool (QGIS for VolcAnic SuscepTibility; Bartolini et al., 2013), to generate quantitative assessment of volcanic susceptibility in the island. This tool is backed on a probabilistic method that uses the calculation of a kernel function at each data location to estimate probability density functions (PDFs). The method is based on the distance from nearby volcanic structures and a smoothing parameter, also known as smoothing factor, parameter  $h$  or bandwidth, which represents the degree of randomness in the distribution of past events. Our volcano-structural data sets (vents, and eruptive fissures onshore and offshore, and faults) plus the stress field (Fig. 3), were combined by assigning to each of them the corresponding relevance and reliability values (Martí and Felpeto, 2010) through an elicitation of expert judgment procedure (Aspinall, 2006) among the members of the GVB-CSIC and external collaborators (14 experts in total).

We applied the LSCV method (Cappello et al. 2012) to evaluate the bandwidth of each dataset; meanwhile a group of experts evaluated the relevance of the datasets following the methodology proposed by Aspinall (2006). Since all datasets come from previously published volcano-structural studies and direct field observations, their reliability has been considered as maximum in all the datasets.

The bandwidth parameter ( $h$ ) obtained for each of the defined datasets were (Table 3): i) 2,527 m for vents and fissures of the Miocene-Pliocene; ii) 2,808 m for vents and fissures of the Pleistocene; iii) 560 m for the vents and fissures of the Holocene; iv) 6,508 m for vents and fissures offshore; and v) 20,808 m for faults (Table 3).

Considering the regional stress field model of Geyer et al. (2016) and the different ages of the volcano-structural elements, the expert judgement elicitation assigned the following weights to each data set: i) 0.107 for vents and fissures of the Miocene-Pliocene; ii) 0.207 for ~~the~~ vents and fissures of the Pleistocene; iii) 0.357 for ~~the~~ vents and fissures of the Holocene; iv) 0.193 for offshore vents and fissures; and v) 0.136 for faults (Table 3).



240 The total susceptibility map was obtained by assigning different weights to each of the PDFs,  
which are then combined via a weighted sum and modelled in a non-homogeneous Poisson process (Fig.  
4).

## 7 Eruptive scenarios

245

### 7.1 Fallout Scenarios

Fallout scenarios were obtained using VORIS 2.0.1 tool (Felpeto et al., 2007). The input data regarding  
the eruptive column and ash particle size were inferred from data published from the historical eruptions  
250 (Romero 1991; Carracedo et al. 1992; Ancochea et al., 2004; IGME maps (2004), and references therein).  
We simulated one scenario with the same eruptive parameters of <sup>the</sup> 1824 eruption considering a maximum  
column height of 3 km and a total emitted volume of 0.02 km<sup>3</sup> (Table 4) <sup>in 24</sup> since this scenario <sup>can be</sup> the  
most expected in the near future in the island. <sup>because</sup>

All simulations were conducted from one of the pixels located in the highest spatial probability  
255 area, and data inputs of wind velocities were compiled from the University of Wyoming Department of  
Atmospheric Science sounding database (<http://weather.uwyo.edu/upperair/sounding.html>) at different  
vertical heights (500, 1500, 2500, 3500 and 5000 m). We focused the attention of our study on the fallout  
scenarios for the entire wind rose directions and for the NE direction, which represents the typical north-  
east trade wind that characterises the Canary Islands latitude. Results are shown in Figure 5.

260 Figure 5a shows the ash fall distribution from the highest susceptibility pixel, taking the average  
winds of the Canary Islands in any given day. Figure 5b shows the distribution of the fallout from the  
same pixel considering the parameters of the 1824 eruption: column height of 3 km and a total emitted  
volume of 0.02 km<sup>3</sup>. Particle sizes in all simulations were considered in a range from 6 to 2  $\phi$  thereby  
covering the entire range of particle sizes observed in the field. <sup>in all simulations</sup>

265

### 7.2 Lava Flow Scenarios

The most expected processes associated with an effusive eruption in Lanzarote are lava flows. Lava flow  
scenarios were performed for the whole island, and as single vent scenarios reproducing <sup>the</sup> lava flows of

270 <sup>the</sup> 1730-36 and 1824 eruptions. For the first case, we used the whole susceptibility map (Fig. 4), only taking  
into account the on-land pixels. For single vent scenarios, we used only those pixels with the highest  
spatial probability values. Lava flow input parameters were constrained by maximum flow lengths and  
thicknesses taken from historical eruptions and field measurements. We assumed flow lengths up to 35  
km, <sup>because of</sup> since 1730-36 eruption poured out lavas that reached the sea after paths of 21 km onshore. Maximum  
275 lava flow length considered for the 1824 eruption was 7 km, while for the whole lava flow map <sup>a</sup> maxi-  
mum length was 25 km. The thickness used as input for all the models was 10 m. The results provide two  
single vent scenario maps and a total map that gives the probability that any particular cell is invaded by a  
lava flow (Fig. 6). The total lava flow map was performed with a cell size of 75 m, thus optimizing the  
result and computed time.

### 7.3 Pyroclastic Density Current Scenarios

Hydromagmatic eruptions have also occurred on Lanzarote in recent times and have generated a wide variety of pyroclastic density currents (PDCs) deposits. It is possible to recognise pure hydromagmatic edifices and also Strombolian edifices with phreatomagmatic phases (García-Cacho and Romero, 2000). For that, we have mainly simulated hydromagmatic edifices in areas close to the previous vents but also some phreatomagmatic phases that could occur together with Strombolian activity. PDCs were simulated with an energy cone model (Sheridan and Malin, 1983) using as input parameters topography, the collapse equivalent height (H) and the collapse equivalent angle ( $\theta$ ), which is obtained through the arctangent of the ratio between Hc and L, where L represents the run-out length (Felpeto et al., 2007; Toyos et al., 2007).

L values were considered to be equivalent to the most distal exposure of PDC deposits found on the island (Tables 1 and 4), which correspond to lengths from 0.5 to 3 km. H was assumed to be 250 m for all simulations, considering similar kind of eruptive styles for these hydromagmatic eruptions (Toyos et al., 2007). We simulated PDCs with  $\theta$  in the range of around 5–29°. Figure 7 shows coverage areas with different Heim coefficients and VEI values, reaching the deposits up to almost 15 km.

### 8 Discussion and conclusions

Lanzarote is one of the four islands of the Canary Archipelago that has hosted important eruptive activity during the last 600 years (historical period), being the Timanfaya eruption in 1730-1736 the second largest historical eruption occurred on European territory. This, together with the fact that it is the third preferred touristic destination of the Canary Islands, classifies Lanzarote as an active volcanic island for which a precise hazard assessment is urgently required.

Past on-land volcanism has been mainly characterised by multiple-fissure type eruptions of basaltic magmas, generating lava flows of variable length and small to medium sized cinder cones, so we should expect future eruptions being of the same type. A few hydromagmatic eruptions have also been recognised along the coast line or close to it, which generated Surtseyan activity when eruptive magma interacted directly with sea water (e.g.: El Golfo, Pedrazzi et al., 2013) or phreatomagmatic pulses when magma interacted with a saltwater intrusion near the coast (e.g.: El Cuchillo, Aparicio et al., 1994), respectively. In this case, different types of dilute PDC deposits were produced, together with ballistics and fallout, reaching distances up to 15 km from the vent. Moreover, the large number of well-preserved cones observed on the submerged slopes of the island suggests that the number of submarine eruptions in recent times may be similar or significantly higher than those from on-land. This suggests that a submarine eruption scenario should be considered as highly probable. Unfortunately, the lack of geochronological data precludes establishing the eruption recurrence in Lanzarote, so not allowing to conduct a temporal hazard assessment and to quantitatively identify the most probable eruptive scenarios. Therefore,



our hazard assessment is restricted to the on-land volcanism, without this implying that a subaerial eruption is the one with the highest probability of occurrence on Lanzarote in the near future.

320 The spatial analysis revealed that the area with the highest probability of hosting a new subaerial eruption is mainly located in the same area than the previous 1824 and Timanfaya eruptions. This is mainly due to fact that the best preserved vents are concentrated in this zone (Figs. 1, 4), but also that the current stress field is compatible with orientation of fractures that governed these most recent eruptions (Fig. 3). Our results contrast a <sup>slightly</sup> little bit with those recently presented by Galindo et al (2016). The <sup>are some</sup> differences <sup>our study follows the method of</sup> observed for the on-land areas may be due to the different method used in both studies, but we have <sup>that</sup> preferred to stay with Cappello et al. (2013) method, as it has been proved successfully in many volcanic fields such as Etna, El Hierro, Deception Island or Pico (Cappello et al., 2012; Becerril et al., 2013; Bartolini et al., 2014; Cappello et al., 2015), rather than to try a new one as done by Galindo et al (2016).

330 Simulation of the different volcanic hazards that may ~~be~~ produced ~~by~~ subaerial eruptions on Lanzarote revealed that ~~the~~ opening of new eruptive fissures in the highest probability areas, <sup>A</sup> assuming a new typical Strombolian eruption and the typical winds of the Canary Islands (NE-SE winds), would imply the dispersion of the volcanic ash mainly towards the southern part of the island. As mentioned before, this area hosts a high number of tourist resorts, so <sup>will</sup> probably a large number of people <sup>in case of an eruption,</sup> should be evacuated <sup>rather</sup> in case of an eruption (Fig. 5).

335 Lava flows are ~~more~~ constrained to the area around their vents. This implies that, according to the hazard map, if we expect a typical Strombolian eruption with lava flow emission, those areas that could be affected by this process, are mainly located <sup>around</sup> surrounding the Timanfaya National Park. This area includes two protected figures (a National Park and a Natural Park), but it does not host too many towns or infrastructures. If, on the contrary, we expect larger eruptions, in terms of emitted volume, the runout <sup>the</sup> distances of the lava flows would be <sup>longer</sup> bigger, affecting numerous towns and villages around Timanfaya area, and others located to the north (Guatiza, Mala in Fig. 6). The rest of the island would be practically unaffected by lava flows.

Finally, the occurrence of PDC is restricted to areas close to the coast, where the majority of the identified past hydromagmatic events are concentrated, being in age older than the most recent eruptions. 345 However, such scenarios must be also considered as they may imply larger impacts than normal Strombolian eruptions.

#### Acknowledgements

350 This research has been financially supported by the European Commission's Humanitarian Aid and Civil Protection department (EC ECHO project SI.2.695524 (VeTOOLS) 2015-2016).

## References

- Ancochea, E., Barrera, J.L., Bellido, F., Benito, R., Brändle, J.L., Cebriá, J.M., Coello, J., Cubas, C.R., De La Nuez, J., Doblas, M., Gómez, J.A., Gómez, J.A., Hernán, F., Herrera, R., Huertas, M.J., López-Ruiz, J., Martí, J., Muñoz, M. and Sagrado, J.: Canarias y el vulcanismo neógeno peninsular. En: *Geología de España*, (J.A. Vera, ed.), SGE-IGME, Madrid, 635-682, 2004.
- Aparicio, A., Araña, V., and Díez-Gil, J.L.: Una erupción hidromágmatía en la isla de Lanzarote: La Caldera de El Cuchillo. *Elementos de Volcanología* nº 3. Serie Casa de Los Volcanes. Excmo. Cabildo Insular de Lanzarote, 109–120, 1994.
- Armienti, P., Innocenti, F., Pareschi, M. T., Pompilio, M., and Rocchi, S. Crystal Population Density in not Stationary Volcanic Systems: Estimate of Olivine Growth Rate in Basalts of Lanzarote (Canary Islands). *Mineral. and Petrol.*, 44, 181-196, 1991.
- Aspinall, W.P.: Structured elicitation of expert judgment for probabilistic hazard and risk assessment in volcanic eruptions. In: Mader, H.M., Coles, S.G., Connor, C.B., Connor, L.J. (Eds.), *Statistics in Volcanology: Special Publication of IAVCEI*, 1. Geol.Soc. London, pp. 15–30, 2006.
- Banda, E., Dañobeitia, J. J. Suríach, E. and Ansorge, J.: Features of crustal structure under the Canary Islands, *Earth Planet. Sci. Lett.*, 55, 11–24, 1981.
- Bartolini, S., Cappello, A., Martí, J. and Del Negro, C.: QVAST: A new Quantum GIS plugin for estimating volcanic susceptibility. *Nat. Hazards Earth Syst. Sci.*, 13(11), 3031–3042, 2013.
- Bartolini, S., Geyer, A., Martí, J., Pedrazzi, D. and Aguirre-Díaz, G. Volcanic hazard on deception Island (South Shetland Islands, Antarctica), *J Volcanol Geotherm Res.*, 285:150–168, 2014. doi:10.1016/j.jvolgeores.2014.08.009
- Bebbington, M. S. and Cronin, S.: Spatio-temporal hazard estimation in the Auckland Volcanic Field, New Zealand, with a new event-order model. *Bull. Volcanol.*, 73, 55–72, 2011, DOI 10.1007/s00445-010-0403-6
- Becerril, L., Cappello, A., Galindo, I., Neri, M., and Del Negro, C.: Spatial probability distribution of future volcanic eruptions at El Hierro Island (Canary Islands, Spain). *J. Volcanol. Geoth. Res.*, 257, 21–30, 2013.
- Becerril, L., Bartolini, S., Sobradelo, R., Martí, J., Morales, J.M. and Galindo, I.: Long-term volcanic hazard assessment on El Hierro (Canary Islands). *Nat. Hazards Earth Syst. Sci.*, 2, 1799–1835, 2014.
- Becerril, L., Galindo, I., Martí, J. and Gudmundsson, A.: Three-Armed Rifts or Masked Radial Pattern of Eruptive Fissures? The Intriguing Case of El Hierro Volcano (Canary Islands). *Tectonophysics*, 33–47, 647–648, 2015.
- Bevilacqua, A., Isaia, R., Neri, A., Vitale, S., Aspinall, W.P., Bisson, M., Flandoli, F., Baxter, P.J., Bertagnini, A., Esposti Ongaro, T., Iannuzzi, E., Pistolesi, M. and Rosi, M.: Quantifying volcanic hazard

- 385 at Campi Flegrei caldera (Italy) with uncertainty assessment: 1. Vent opening maps, *J. Geophys. Res. Solid Earth*, 2015, doi:10.1002/2014JB011775
- Camacho, A. G., Montesinos, F. G., Vieira, R., and Arnoso J.: Modelling of crustal anomalies of Lanzarote (Canary Islands) in light of gravity data, *Geophys. J. Int.*, 147, 403–414, 2001.
- Cappello, A., Neri, M., Acocella, V., Gallo, G., Vicari, A., and Del Negro, C.: Spatial vent opening probability map of Mt Etna volcano (Sicily, Italy), *Bull. Volcanol.*, 74, 2083–2094, 2012.
- 390 Cappello, A., Bilotta, G., Neri, M., and Del Negro, C.: Probabilistic modeling of future volcanic eruptions at Mount Etna, *J. Geophys. Res.*, 118, 1925–1935, doi:10.1002/jgrb.50190, 2013.
- Cappello, A., Zanon, V., Del Negro, C., Ferreira, T. J. L. and Queiroz, M. G. P. S.: Exploring lava-flow hazards at Pico Island, Azores Archipelago (Portugal). *Terra Nova*, 27, 156–161, 2015.
- 395 Carracedo, J. C., Badiola, E. R. and Soler, V.: The 1730–1736 eruption of Lanzarote, Canary Islands: a long, high-magnitude basaltic fissure eruption. *J. Volcanol. Geotherm. Res.*, 53, 239–250, 1992.
- Carracedo, J. C. and Rodríguez Badiola, E.: Evolución geológica y magmática de la isla de Lanzarote, Islas Canarias. *Rev. Acad. Canaria Ciencias*, 4, 25–58, 1993.
- Coello J. Cantagrel, J. M., Hernan, F., Fuster, J.M., Ibarrola E., Ancochea, E., Casquet, C., Jamond, C., Diaz, de Teran, J.R and Cendrero, A.: Evolution of the eastern volcanic ridge of the Canary Islands based on new K-Ar data. *J. Volcanol. Geotherm. Res.* 53, 251–274, 1992.
- 400 Connor, C.B.: Cinder Cone Clustering in the TransMexican Volcanic Belt: Implications for Structural and Petrologic Models: *J. Volcanol. Geotherm. Res.* 95, 395–319–405, 1990.
- Connor, C.B., Condit, C.D., Crumpler, L.S., and Aubele, J.C. Evidence of Regional Structural Controls on Vent Distribution: Springerville Volcanic Field, Arizona: *Journal of Geophysical Research*, v. 97, no. 12, p. 12349–12359, 1992.
- 405 Connor, C.B. and Conway, F.M.: Basaltic volcanic fields. In: Sigurdsson, H. (Ed.), *Encyclopedia of Volcanoes*. Academic Press, New York, pp. 331–343, 2000.
- Connor, C., Stamatakis, J.A., Ferrill, D.A., Hill, B.E., Ofoegbu, G.I., Conway, F.M., Sagar, B. and Trapp, J.: Geologic factors controlling patterns of small-volume basaltic volcanism: application to a volcanic hazards assessment at Yucca Mountain, Nevada. *J Geophys Res.*, 105, 417–432, 2000.
- 410 De la Nuez, J., Quesada, M.L. and Alonso, J.J.: Los volcanes de los islotes al norte de Lanzarote, Fundación César Manrique, Teguiise, Lanzarote, 233 pp., 1997.
- Felpeto, A.: Modelización física y simulación numérica de procesos eruptivos para la generación de mapas de peligrosidad volcánica, Ph.D. thesis, University of Madrid
- 415

- Felpeto, A., Araña, V., Ortiz, R., Astiz, M., and García, A.: Assessment and modelling of lava flow hazard on Lanzarote (Canary Islands), *Nat. Hazards*, 23, 247–257, 2001.
- Felpeto, A., Martí, J., and Ortiz, R.: Automatic GIS-based system for volcanic hazard assessment, *J. Volcanol. Geoth. Res.*, 166, 106–116, doi:10.1016/j.jvolgeores.2007.07.008, 2007.
- 420 Gaffney, E. S., Damjanac, B. and Valentine, G. A. Localization of volcanic activity: 2. Effects of pre-existing structure. *Earth Planet. Sci. Lett.*, 263, 323–338, 2007.
- Galindo, I., Romero, M.C, Sánchez, N., Morales, J.M.: Quantitative volcanic susceptibility analysis of Lanzarote and Chinijo Islands based on kernel density estimation via a linear diffusion process. *Sci. Rep.* 6, 27381; doi: 10.1038/srep27381, 2016.
- 425 Geyer, A., Martí, J. and Vilaseñor, A.: First-order estimate of the Canary Islands plate-scale stress field: Implications for volcanic hazard assessment. *Tectonophysics*, 679, 125–139, 2016.
- Hernández-Pacheco, E.: En relación a las grandes erupciones volcánicas del Siglo XVIII y 1824, en Lanzarote. *El Museo Canario*, 73, 239-254, 1960.
- Ho, C.H.: Risk assessment for the Yucca Mountain high-level nuclear waste repository site: estimation of volcanic disruption. *Math Geol*, 24, 347–364, 1992.
- 430 Ho, C.H.: Sensitivity in volcanic hazard assessment for the Yucca Mountain high-level nuclear waste repository site: the model and the data. *Math Geol* 27, 239–258, 1995.
- Ho, C.H. and Smith, E.I. A spatial-temporal/3-D model for volcanic hazard assessment: application to the Yucca Mountain region, Nevada. *Math Geol*, 30, 497–510, 1998.
- 435 IGME: Memorias mapas MAGNA Lanzarote 1:25000. Hojas: Guatiza, Arrecife, Yaiza, Haría, Tegui, Soo, Tinajo, Femés, Graciosa, Alegranza, Caleta de Sebo. Instituto Geológico y Minero de España, Madrid, 2004.
- IGME: Mapa geológico de España escala 1:100.000, 88, Lanzarote. Instituto Geológico y Minero de España, Madrid, 2005.
- 440 Le Corvec, N., Spörli, K. B., Rowland, J., and Lindsay, J. Spatial distribution and alignments of volcanic centers: Clues to the formation of monogenetic volcanic fields, *Earth Sci. Rev.*, 124, 96–114, 2013.
- Marinoni, L.B. and Pasquarè, G.: Tectonic evolution of the emergent part of a volcanic ocean island: Lanzarote, Canary Islands. *Tectonophysics*, 239 (1-4), 111-137, 1994.
- Martí, J. and Colombo, F.: Estratigrafía, sedimentología y mecanismos eruptivos del edificio hidromagmático de El Golfo (Lanzarote). *Bol. Geol. Min.*, 101, 560-579, 1990.
- 445 Martí, J. and Felpeto, A.: Methodology for the computation of volcanic susceptibility. An example for mafic and felsic eruptions on Tenerife (Canary Islands), *J. Volcanol. Geoth. Res.* 195, 69–77, doi:10.1016/j.jvolgeores.2010.06.008, 2010.

- 450 Martí, J., Bartolini, S. and Becerril, L.: The challenge of conducting volcanic hazard assessment and risk management. What the VeTOOLS project can offer us?, EOS, 2016a.
- Martí, J., López, C., Bartolini, S., Becerril, L. and Geyer, A.: Stress controls of monogenetic volcanism: a review, *Front. Earth Sci.* 4:106. doi:10.3389/feart.2016.00106, 2016b.
- Martin, A.J., Umeda, K., Connor, C.B., Weller, J.N., Zhao, D., Takahashi, M.: Modeling long-term volcanic hazards through Bayesian inference: an example from the Tohoku volcanic arc, Japan. *J. Geophys. Res.* 109, B10208, 2004.
- 455 Ortiz, R., Araña, V. and Valverde, C.: Aproximación al conocimiento del mecanismo de la erupción de 1730–1736 en Lanzarote: *Anales de Física Serie B.* 82 Especial Issue. “Física de los Fenómenos Volcánicos”, 127–142 pp., 1986.
- Pedrazzi, D., Martí, J., and Geyer, A.: Stratigraphy, sedimentology and eruptive mechanisms in the tuff cone of El Golfo (Lanzarote, Canary Islands). *Bull Volcanol* 75:740, 2013.
- 460 Romero, C.: La erupción de Timanfaya (Lanzarote, 1730–1736). Análisis documental y estudio geomorfológico (Universidad de La Laguna, secretariado de publicaciones, La Laguna, 1991.ç
- Selva, J., Orsi, G., Di Vito, M., Marzocchi, W. and Sandri, L.: Probability hazard map for future vent opening at the Campi Flegrei caldera, Italy, *Bull. Volcanol.*, 74, 497–510, 2012.
- 465 Sheridan, M. F. and Malin, M. C.: Application of computer-assisted mapping to volcanic hazard evaluation of surge eruption: Vulcano, Lipari, Vesuvius. *Explosive Volcanism, J. Volcanol. Geoth. Res.*, 17, 187–202, 1983.
- Solana, C., Kilburn, C.R.J. Rodriguez Badiola, E. and Aparicio, A.: Fast emplacement of extensive pahoehoe flow-fields: the case of the 1736 flows from Montaña de las Nueces, Lanzarote, *J. Volcanol. Geoth. Res.*, 132, 189–207, 2004.
- 470 Thordarson, Th., and Self, S.: The Laki (Skaftar Fires) and Grimsvotn eruptions in 1783–1785, *Bull. Volcanol.*, 55, 233–263, 1993.
- Toyos, G. P., Cole, P. D., Felpeto, A., and Martí, J.: A GIS-based methodology for hazard mapping of small pyroclastic density currents, *Nat. Hazards*, 41, 99–112, 2007.

475

**Tables**

| Island    | Map<br>N° | Local Name     | X      | Y       | Start Simula-<br>tion point<br>Height<br>(m.a.s.l.) | Collapse equiva-<br>lent height (He)<br>(m) | Run-<br>out (L)<br>(m) | Collapse<br>Equivalent<br>angle<br>( $\Theta$ ) (°) | Basal Di-<br>ameter<br>(km) | Type/Characteristics | Trend |
|-----------|-----------|----------------|--------|---------|-----------------------------------------------------|---------------------------------------------|------------------------|-----------------------------------------------------|-----------------------------|----------------------|-------|
| LANZAROTE | 1         | El Golfo       | 614214 | 3205971 | 0                                                   | 250                                         | 2500                   | 5.71                                                | 1                           | Tuff Cone            | N50°E |
|           | 2         | Caldera Blanca | 623734 | 3213091 | 142                                                 | 250                                         | 3000                   | 7.44                                                | 1.8                         | Maar                 | N85°E |
|           | 3         | El Cuchillo    | 631054 | 3218877 | 42                                                  | 250                                         | 3000                   | 5.56                                                | 1.4                         | Tuff Ring            | N65°E |
|           | 4         | Mt. Cavera     | 637305 | 3222578 | 40                                                  | 250                                         | 1500                   | 10.94                                               | 0.185                       | Coastal Eruption;    | N33°E |



|    |                         |        |         |     |     |      |       |            |                                                    |         |
|----|-------------------------|--------|---------|-----|-----|------|-------|------------|----------------------------------------------------|---------|
| 5  | Mt. Chica               | 636346 | 3222139 | 65  | 250 | 1500 | 11.86 | 0.175-0.25 | Wet-surges. Last phases:<br>Strombolian +          | N50°E   |
| 6  | Mt. Mosta               | 632977 | 3219146 | 87  | 250 | 1000 | 18.62 | >0.065     | Coastal Eruption                                   | N96°E   |
| 7  | Mt. Roja                | 611455 | 3193167 | 13  | 250 | 500  | 27.74 | 1.4        | Tuff Cone                                          | N75°E   |
| 8  | Mt. Mojón               | 623996 | 3202946 | 318 | 250 | 1000 | 29.60 | 0.8*0.625  | Tuff-ring                                          | N60°E   |
| 9  | Mt. Guatisea/Mt. Blanca | 633449 | 3208190 | 378 | 250 | 1500 | 22.72 | -          | Strombolian cone with hydromagmatic intercalations | N006° E |
| 10 | Mt. Corona              | 646191 | 3211411 | 115 | 250 | 1500 | 13.68 | 1.2        | Strombolian cone with hydromagmatic intercalations |         |

50482624  
~~8465 4781 0215 8604~~

|         |                 |        |         |       |     |      |       |          |                                                    |       |
|---------|-----------------|--------|---------|-------|-----|------|-------|----------|----------------------------------------------------|-------|
| 13      | Mt. Ubique      | 639999 | 3211732 | 231.5 | 250 | 1500 | 17.80 | 1*1      | Strombolian cone with hydromagmatic intercalations | N50°E |
| 14      | Mt. Tinaché     | 629288 | 3214639 | 291   | 250 | 1500 | 19.83 | 1.25     | Strombolian cone with hydromagmatic intercalations |       |
| 15      | Mt. de Halcones | 615178 | 3209072 | 63    | 250 | 1000 | 17.38 | 0.65     | Strombolian cone with hydromagmatic intercalations | N50°E |
| 16      | Caldera Riscada | 621975 | 3201907 | 322   | 250 | 5000 | 6.53  | 1*0.9    | Strombolian and hydromagmatic phases               | N60°E |
| 17      | Caldera Gritana | 621228 | 3201274 | 343   | 250 | 5000 | 6.76  | 0.65*0.6 | Part of a hydromagmatic edifice                    | N60°E |
| 18      | Mt. Amarilla    | 642207 | 3233381 | 30    | 250 | 1000 | 15.64 | 0.9*0.65 | Strombolian and phreatomagmatic phases             | N45°E |
| LA GRA- |                 |        |         |       |     |      |       |          |                                                    |       |
